# Supplementary material for: The structure and spectroscopy of lanthanide(iii) complexes with 2,2′-bipyridine-1,1′-dioxide in solution and in the solid state: effects of ionic size and solvent on photophysics, ligand structure and coordination
Source: Royal Society of Chemistry journal article supplement (doi:10.1039/b201846m), 2002-01-01

Fig.1s ORTEP drawing of Nd(bpyO2)43+ Thermal ellipsoids were drawn at 25%

probability level and hydrogen atoms were omitted for clarity.

Fig. 1bs Perchlorate anions in the Nd crystal structure.

Fig.2s ORTEP drawing of Lu(bpyO2)43+ Thermal ellipsoids were drawn at 50%

probability level and hydrogen atoms were omitted for clarity.

Fig.3s Absorption spectrum of Nd(bpyO2)43+ at room temperature. ( A ) in CH3CN

solution ; (B) in CH3NO2 solutions.


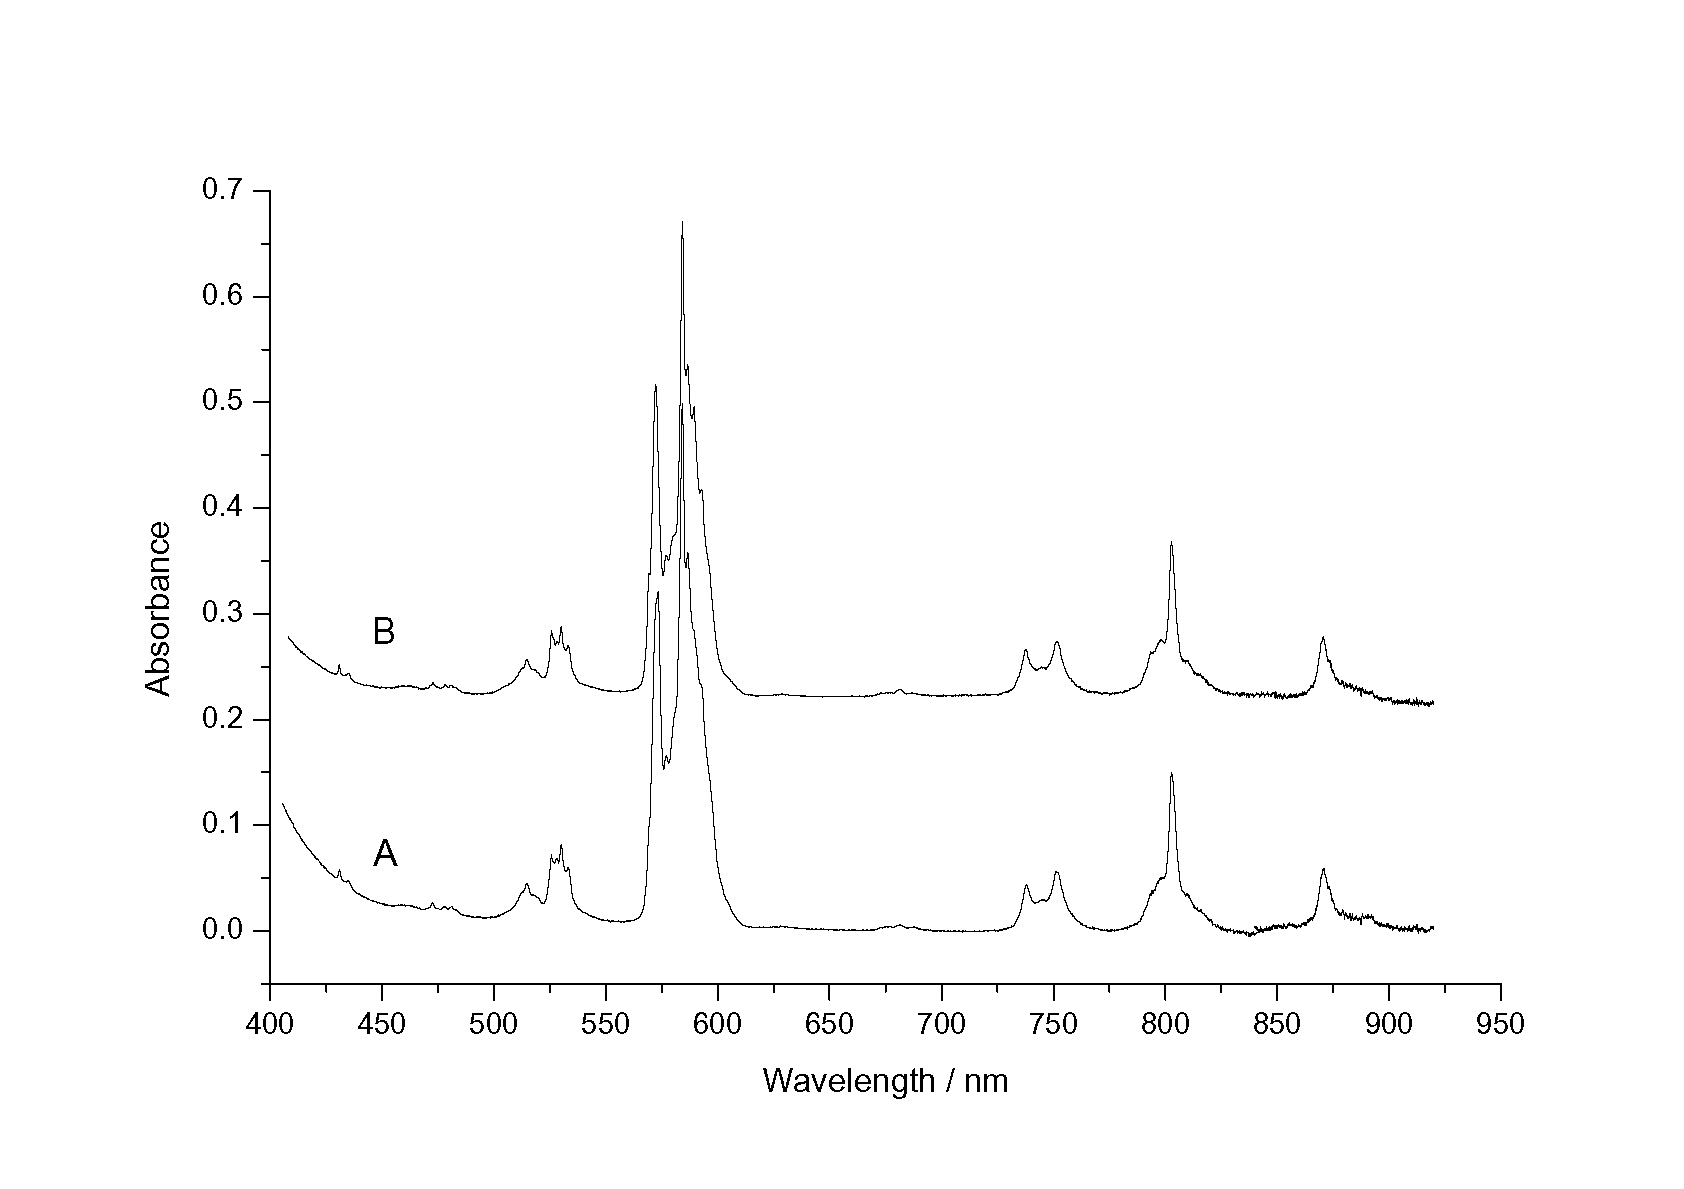

Supplement: b201846m.doc [file b201846m.doc]
